# Supplementary material
Source: PubMed Central journal article supplement (PMC8273077)
Supplement: NIHMS1684070-supplement-FIG_S2.pdf [file NIHMS1684070-supplement-FIG_S2.pdf]

Univariable dose analysis  
in 9 condition subsets

Univariable kernel analysis  
in 9 condition subsets

Univariable slice thickness analysis  
in 9 condition subsets

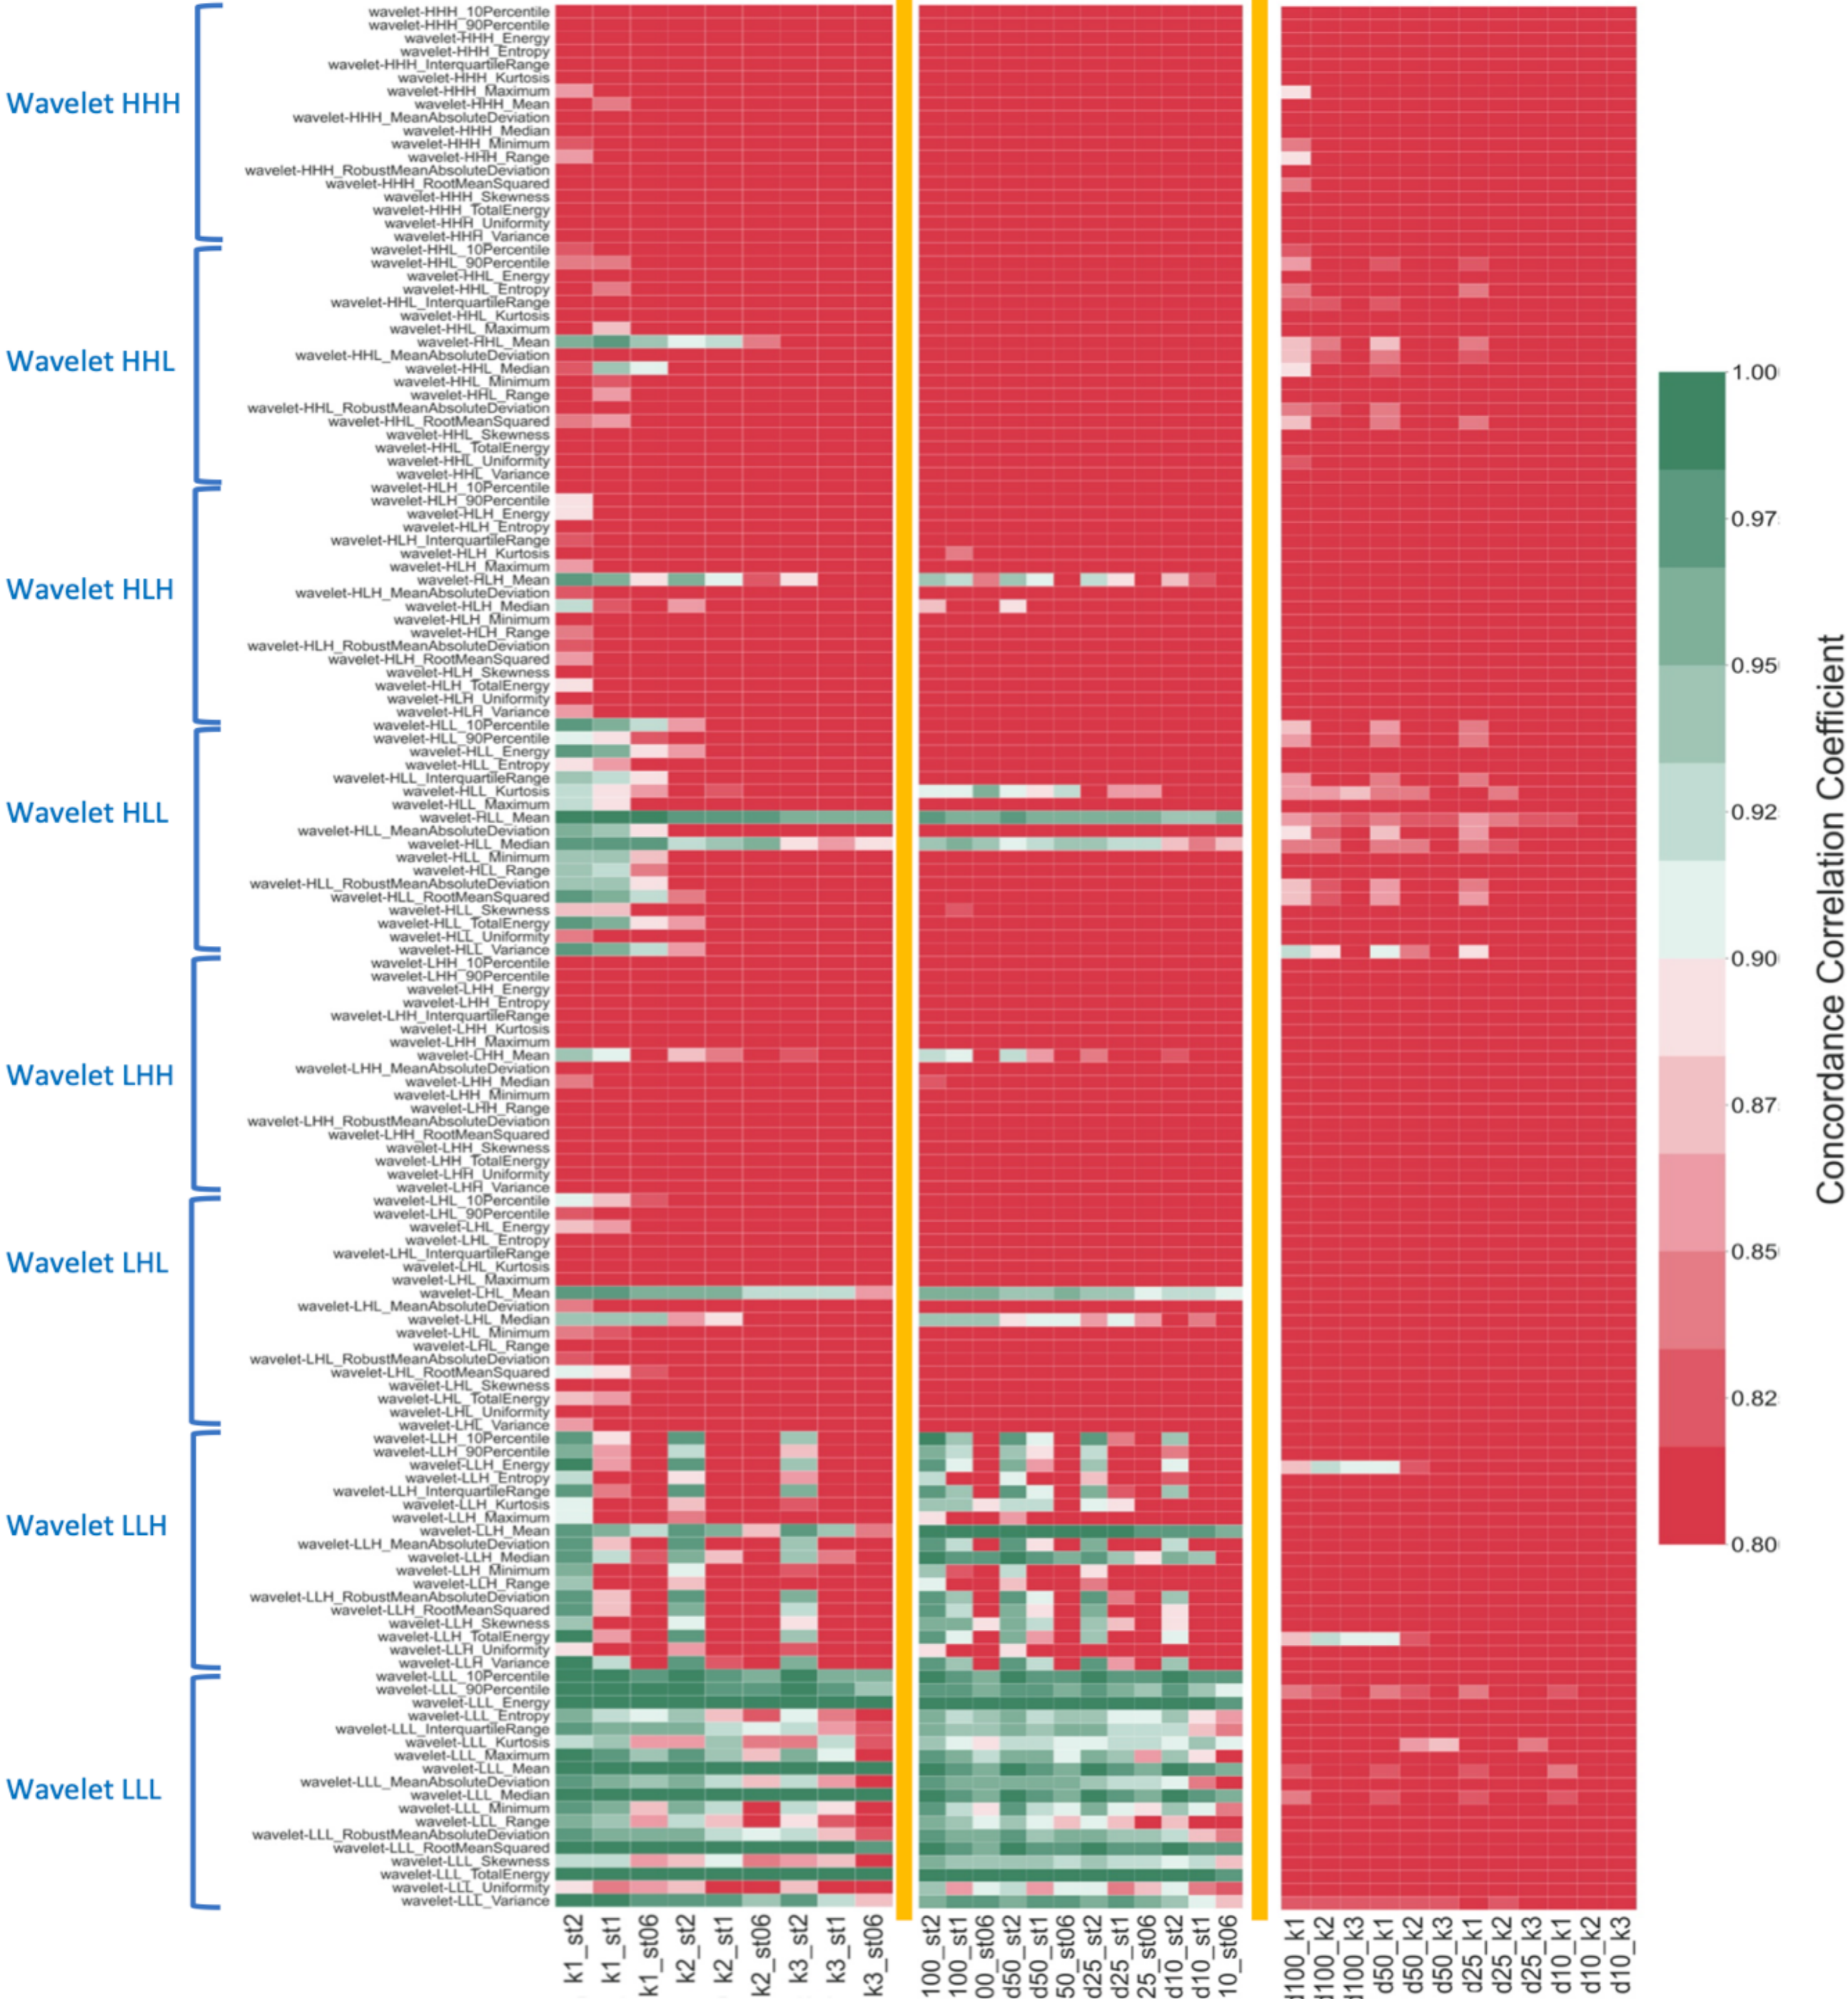

(a)

(b)

(c)

Subset of Conditions
