# Supplementary material
Source: PubMed Central journal article supplement (PMC8273077)
Supplement: NIHMS1684070-supplement-FIG_S4.pdf [file NIHMS1684070-supplement-FIG_S4.pdf]

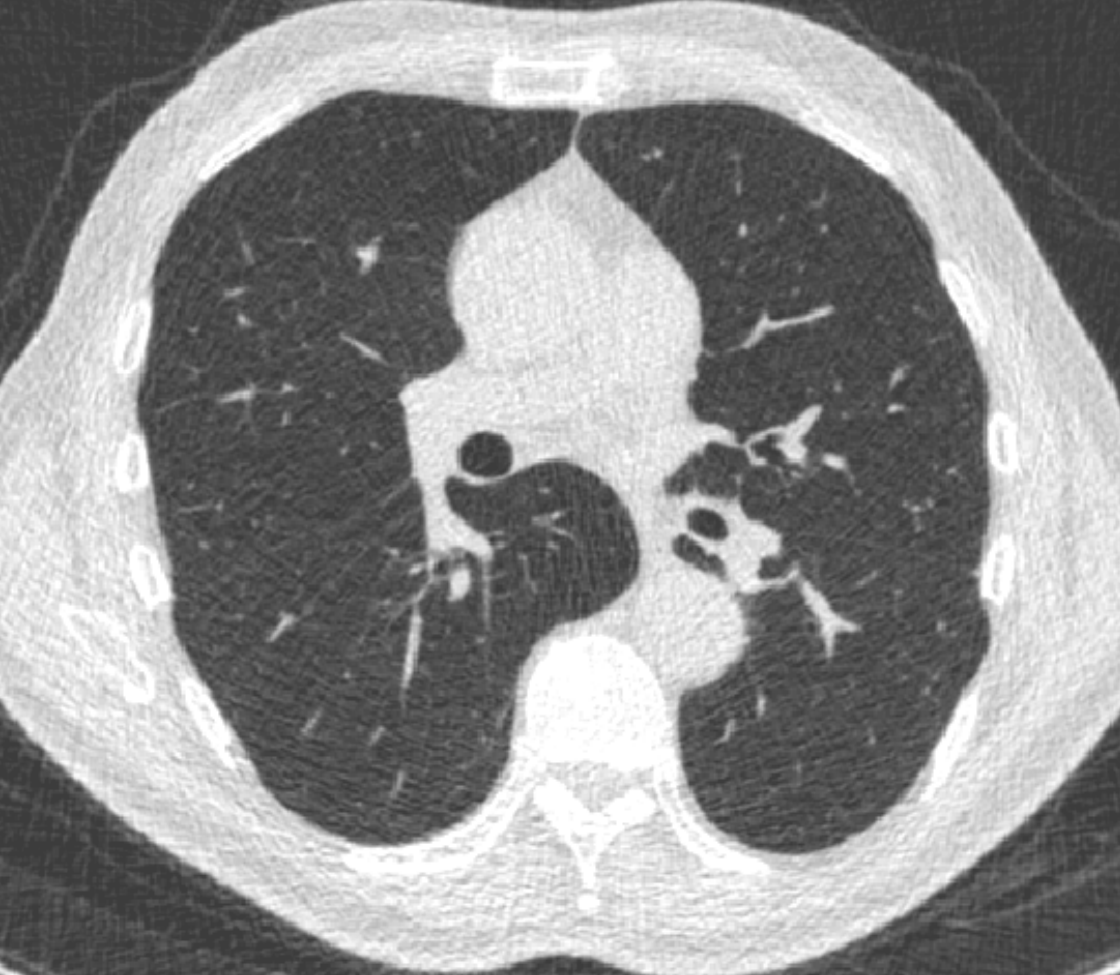

(a) 100% dose, 0.6mm slice thickness, medium kernel

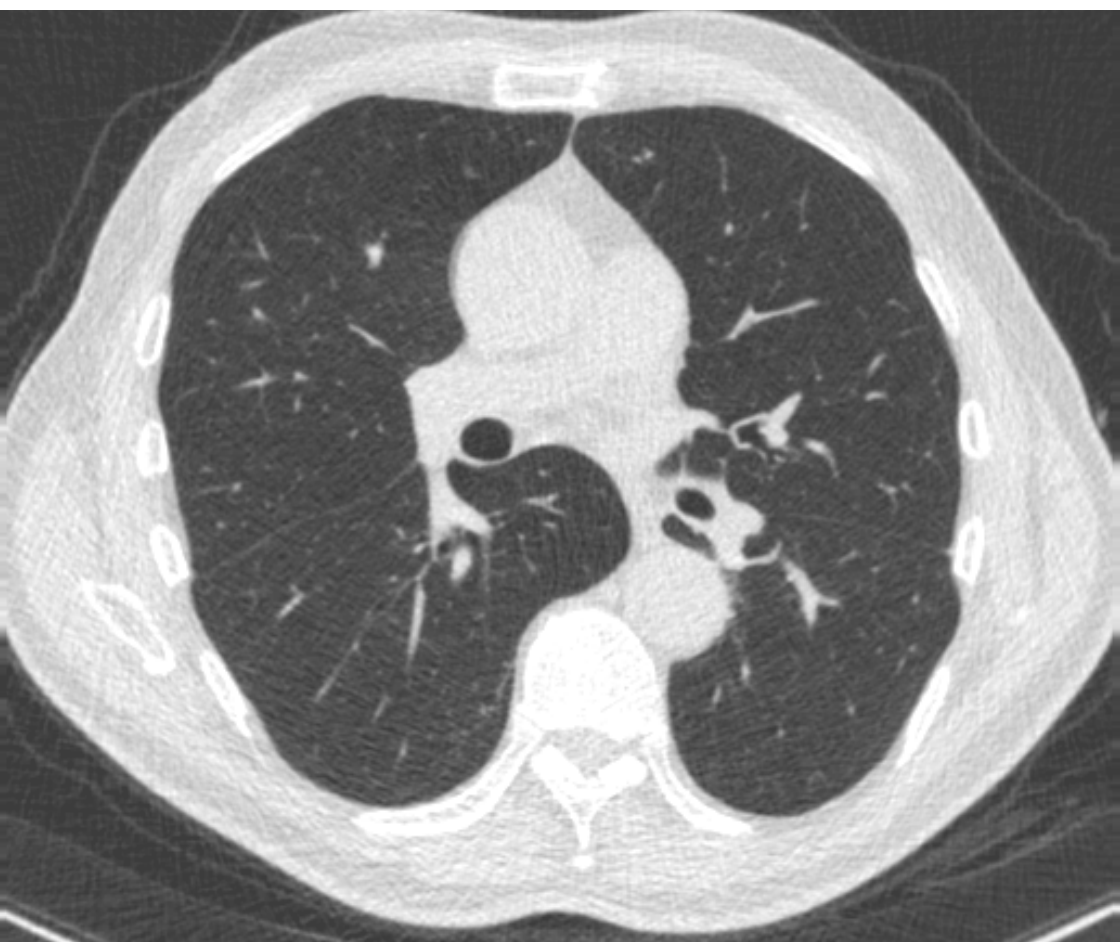

(b) 100% dose, 1mm slice thickness, medium kernel

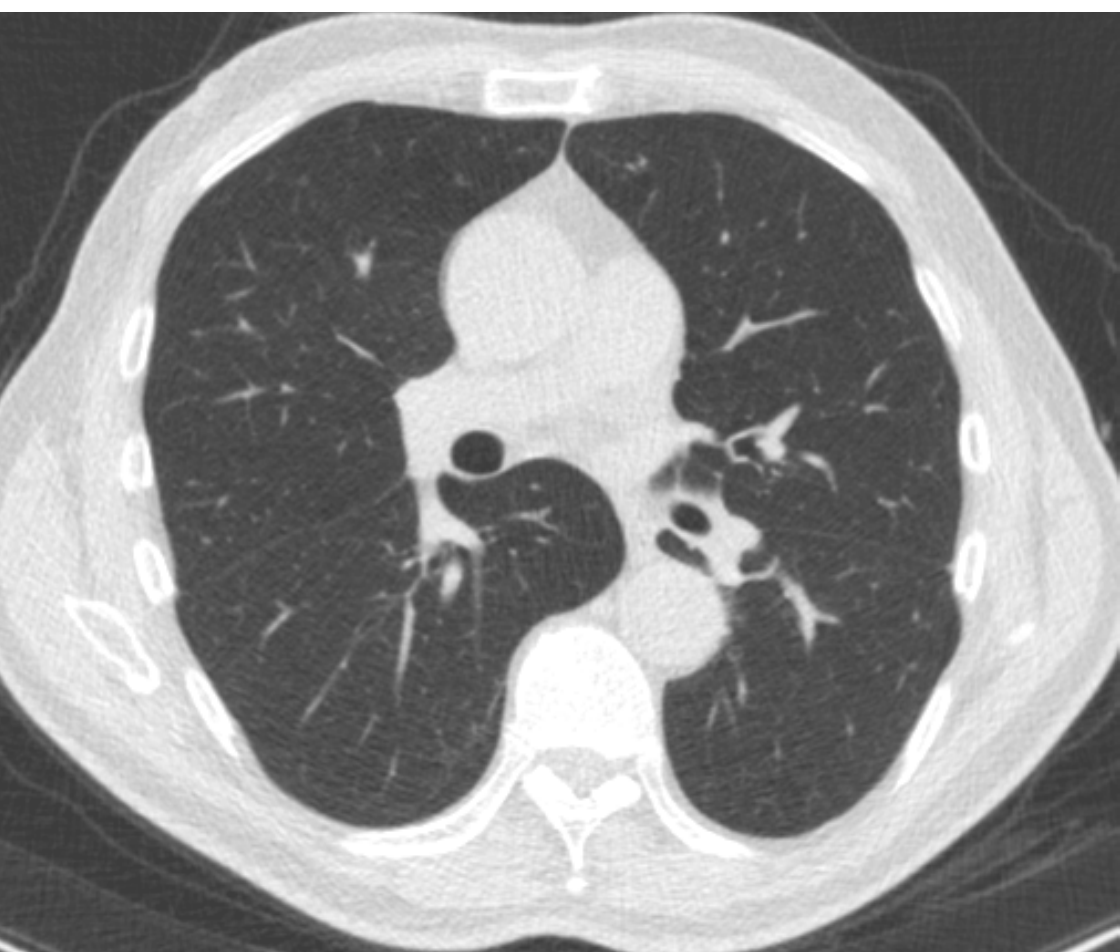

(c) 100% dose, 2mm slice thickness, medium kernel
