# Supplementary material
Source: PubMed Central journal article supplement (PMC8273077)
Supplement: NIHMS1684070-supplement-FIG_S5.pdf [file NIHMS1684070-supplement-FIG_S5.pdf]

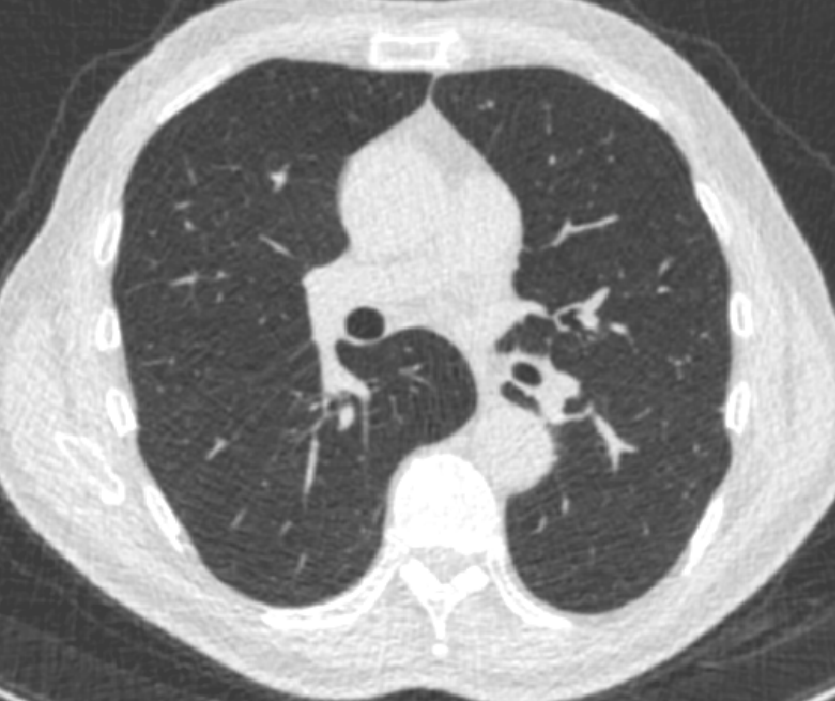

(a) 100 % dose, 0.6mm thickness, smooth kernel

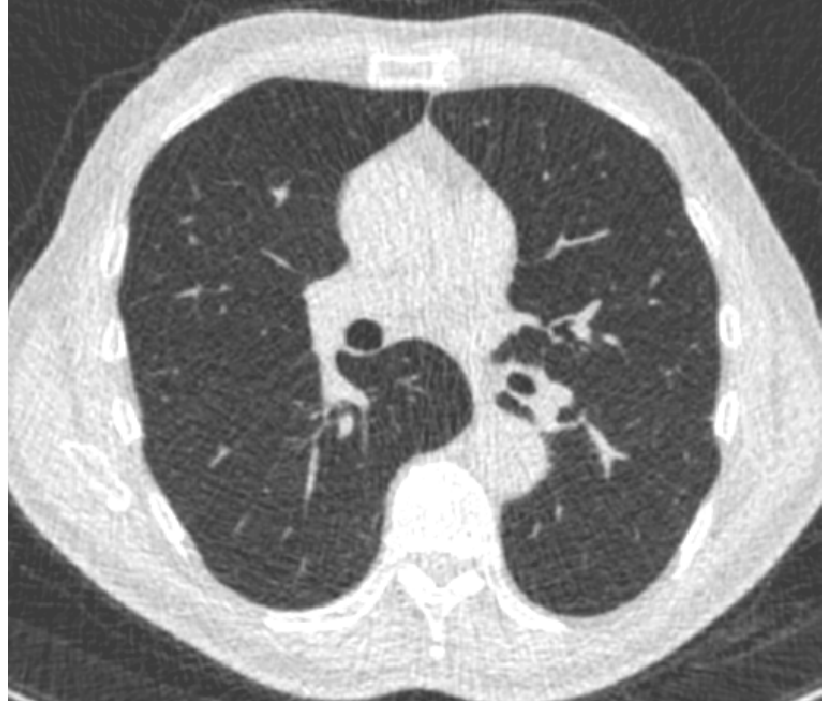

(b) 50 % dose, 0.6mm thickness, smooth kernel

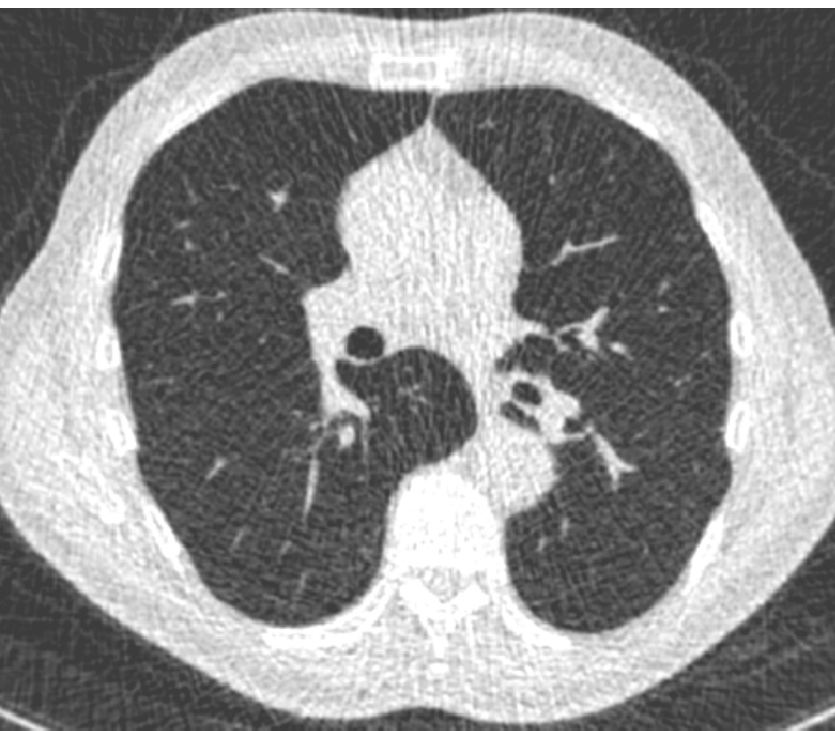

(c) 25 % dose, 0.6mm thickness, smooth kernel

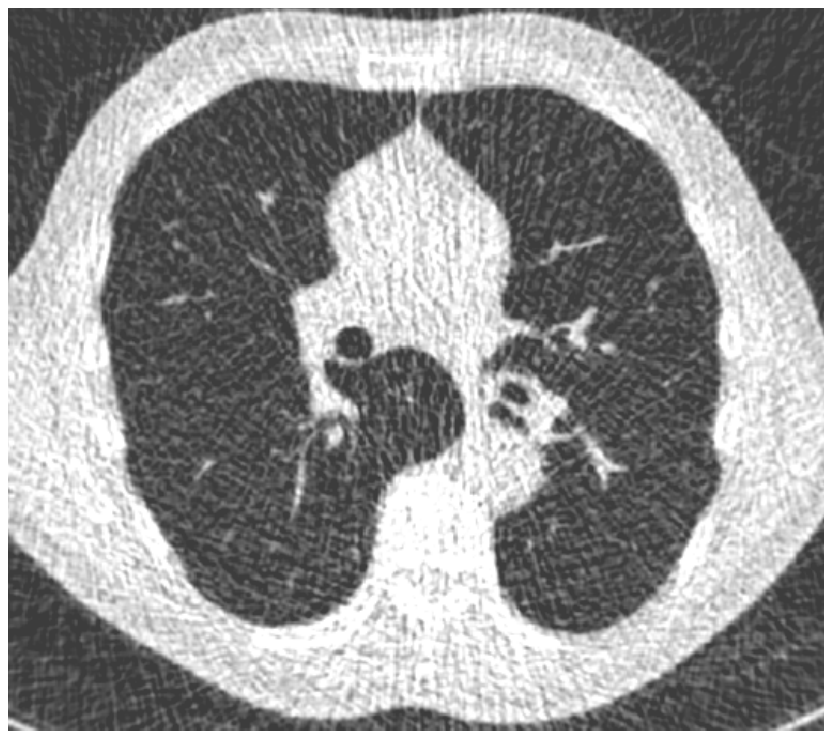

(d) 10 % dose, 0.6mm thickness, smooth kernel
