# Supplementary material
Source: PubMed Central journal article supplement (PMC8273077)

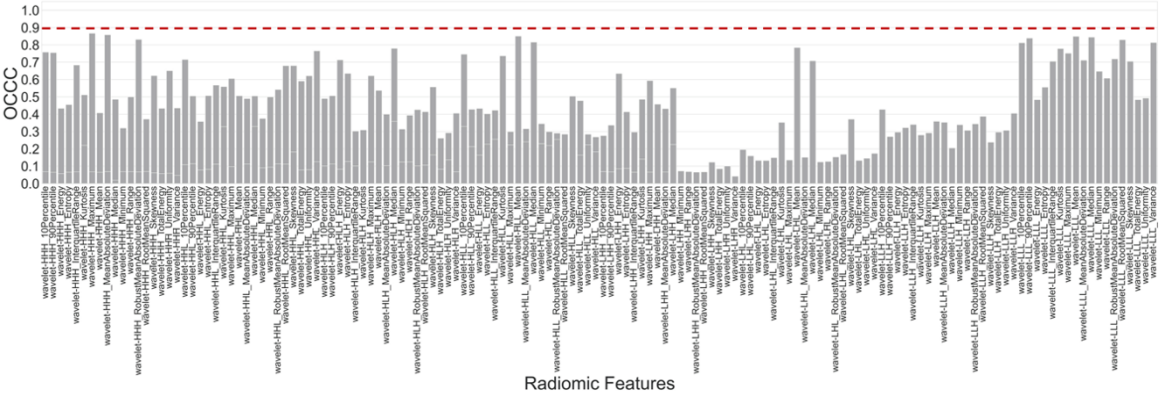

Supplement: NIHMS1684070-supplement-FIG_S1.pdf [file NIHMS1684070-supplement-FIG_S1.pdf]
